# Supplementary material for: Mixed-Phase Fe2O3 Derived from Natural Hematite Ores/C3N4 Z-Scheme Photocatalyst for Ofloxacin Removal
Source: MDPI journal article supplement (doi:10.3390/catal13050792), 2023-04-23
Supplement: s1 [file s1]

Supplementary Materials

# Mixed-Phase $\text{Fe}_2\text{O}_3$ Derived from Natural Hematite Ores/ $\text{C}_3\text{N}_4$ Z-Scheme Photocatalyst for Ofloxacin Removal

Sulakshana Shenoy <sup>1</sup>, Mohsen M. Farahat <sup>1,2</sup>, Chitiphon Chuaicham <sup>1</sup>, Karthikeyan Sekar <sup>1,3</sup>,  
Boopathy Ramasamy <sup>4</sup> and Keiko Sasaki <sup>1,\*</sup>

<sup>1</sup> Department of Earth Resources Engineering, Faculty of Engineering, Kyushu University, 744 Motooka, Nishiku, Fukuoka 819-0395, Japan; sulakshana@mine.kyushu-u.ac.jp (S.S.); mohsen105@hotmail.com (M.M.F.); song@mine.kyushu-u.ac.jp (C.C.); karthiks13@srmist.edu.in (K.S.)

<sup>2</sup> Central Metallurgical Research and Development Institute (CMRDI), P.O. Box 87, Helwan, Cairo 11421, Egypt

<sup>3</sup> Department of Chemistry, Faculty of Engineering and Technology, SRM Institute of Science and Technology, Kattankulathur 603203, Tamil Nadu, India

<sup>4</sup> Environment & Sustainability Department, Institute of Minerals and Materials Technology (CSIR-IMMT), Bhubaneswar 751013, Odisha, India; chemboopathy@gmail.com

\* Correspondence: keikos@mine.kyushu-u.ac.jp; Tel./Fax: +81-92-802-3338

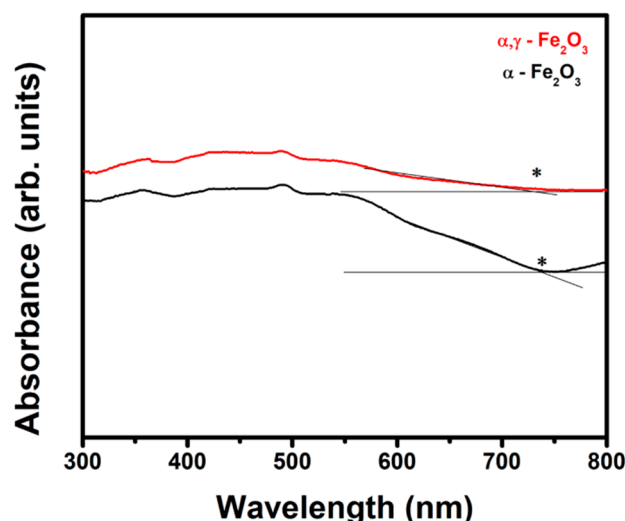

Figure S1. UV-Visible absorption spectra of  $\alpha\text{-Fe}_2\text{O}_3$  and mixed-phase  $\text{Fe}_2\text{O}_3$ .

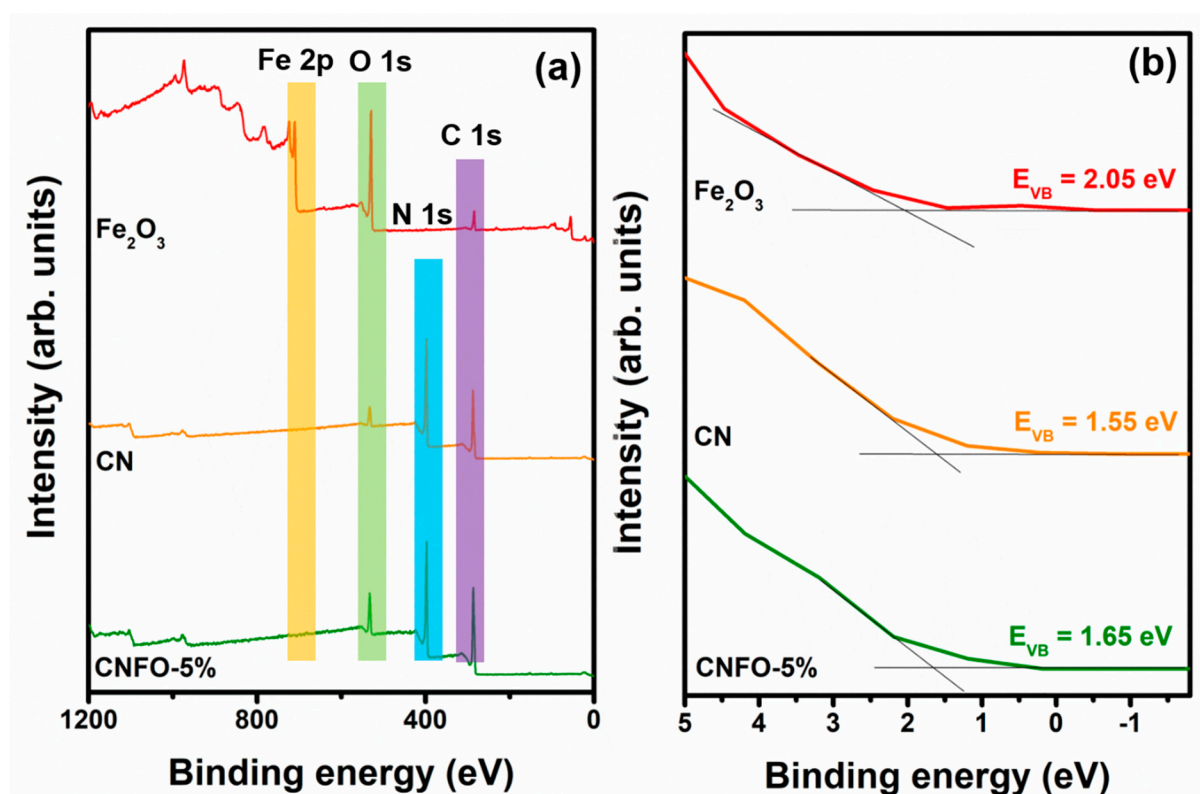

Figure S2. (a) XPS survey spectrum and (b) calculated band edge positions from XPS spectra.

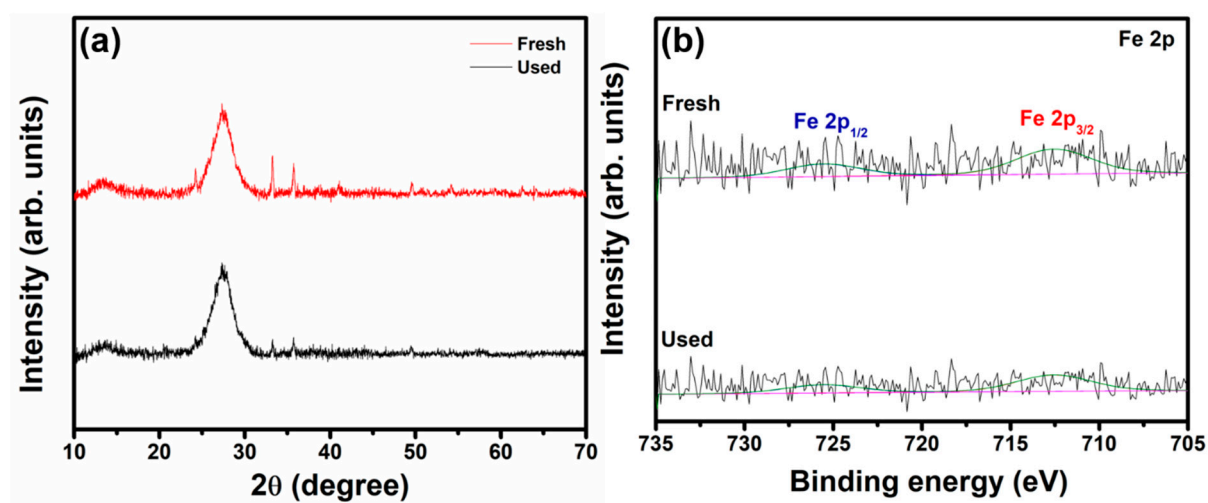

Figure S3. (a) XRD and (b) XPS spectra of the CNFO-5% catalyst after the photodegradation experiments.
